# Supplementary material
Source: PubMed Central journal article supplement (PMC2789179)
Supplement: NIHMS155143-supplement-supplement_1.pdf [file NIHMS155143-supplement-supplement_1.pdf]

## **SUPPLEMENTARY MATERIAL**

**Supplementary Figure 1. Immunohistochemical analysis of TAGLN, TAGLN2, and PPIA expression in pulmonary adenocarcinoma (patient LA11).** Photomicrographs of normal lung tissue (A) and lung adenocarcinoma (B) stained with hematoxylin-eosin. Protein expression of TAGLN (C, D), TAGLN2 (E, F), and PPIA (G, H) in lung tissue (left, normal; right, adenocarcinoma). Original magnifications: 640×.

**Supplementary Figure 2. Immunohistochemical analysis of TAGLN, TAGLN2, and PPIA expression in pulmonary adenocarcinoma (patient LA12).** Photomicrographs of normal lung tissue (A) and lung adenocarcinoma (B) stained with hematoxylin-eosin. Protein expression of TAGLN (C, D), TAGLN2 (E, F), and PPIA (G, H) in lung tissue (left, normal; right, adenocarcinoma). Original magnifications: 640×.

**Supplementary Figure 3. Immunohistochemical analysis of TAGLN, TAGLN2, and PPIA expression in pulmonary adenocarcinoma (patient LA10).** Protein expression of TAGLN (A, B), TAGLN2 (C, D), and PPIA (E, F) in lung tissue (left, normal; right, adenocarcinoma). Note the physiologic expression of TAGLN in smooth muscle cells of small blood vessels in normal lung (A, arrowheads). In this case, PPIA is expressed in few scattered cancer cells (F, arrowheads). Original magnifications: 400×.

**Supplementary Figure 4. Immunohistochemical analysis of TAGLN, TAGLN2, and PPIA expression in pulmonary adenocarcinoma (patient LA14).** Protein expression of TAGLN (A,

B), TAGLN2 (C, D), and PPIA (E, F) in lung tissue (left, normal; right, adenocarcinoma). Original magnifications: 400×.

**Supplementary Figure 5. Expression of TAGLN in pulmonary squamous cell carcinomas.**

(A, B) Representative immunohistochemical demonstration of TAGLN overexpression in myofibroblastic stroma surrounding invasive islands of squamous cell carcinoma (patient LS3). Arrowheads indicate examples of two smaller nests of carcinoma (A). Original magnifications: 100× (A), 400× (B). (C) Western blots of tissue protein extracts from four patients (LS1-4) with moderately differentiated pulmonary squamous cell carcinomas after heparin affinity enrichment.

**Supplementary Table 1.** Detailed information on the MS/MS sequencing of the three identified protein spots

**(1) Spot 1: TAGLN and TAGLN2**

| Rank | Charge | Ions  | dCn    | XCorr  | Reference        | Redundancy | Peptide                         |
|------|--------|-------|--------|--------|------------------|------------|---------------------------------|
| 1    | 2      | 14/16 | 0.2503 | 2.3733 | UPSP:TAGL_HUMAN  | 4          | K.AAEDYGVIK.T                   |
| 1    | 2      | 14/16 | 0.2615 | 3.0126 | UPSP:TAGL_HUMAN  | 5          | K.KYDEELEER.L                   |
| 1    | 2      | 17/26 | 0.3433 | 3.9634 | UPSP:TAGL_HUMAN  | 5          | K.LVNSLYPDGSKPKV.V              |
| 1    | 3      | 28/96 | 0.2019 | 3.8116 | UPSP:TAGL_HUMAN  | 5          | K.LVNSLYPDGSKPKV.VPENPPSM*VFK.Q |
| 1    | 2      | 13/18 | 0.1365 | 2.7350 | UPSP:TAGL_HUMAN  | 6          | K.QM*EQVAQFLK.A                 |
| 1    | 2      | 13/18 | 0.0112 | 2.4931 | UPSP:TAGL_HUMAN  | 6          | K.QMEQVAQFLK.A                  |
| 1    | 2      | 18/24 | 0.3753 | 4.6052 | UPSP:TAGL_HUMAN  | 6          | K.TDM*FQTVDLFEFGK.D             |
| 1    | 3      | 31/76 | 0.3029 | 4.0275 | UPSP:TAGL_HUMAN  | 6          | K.TDM*FQTVDLFEFGKDM*AAVQR.T     |
| 1    | 2      | 13/20 | 0.1069 | 2.6708 | UPSP:TAGL_HUMAN  | 6          | K.VPENPPSM*VFK.Q                |
| 1    | 2      | 11/14 | 0.0086 | 2.0252 | UPSP:TAGL_HUMAN  | 5          | K.YDEELEER.L                    |
| 1    | 2      | 17/20 | 0.2336 | 3.1748 | UPSP:TAGL_HUMAN  | 5          | R.EFTESQLQEGK.H                 |
| 1    | 2      | 10/14 | 0.1633 | 1.8580 | UPSP:TAGL_HUMAN  | 6          | R.GDPNWFWM*K.K                  |
| 1    | 2      | 13/14 | 0.0631 | 2.8782 | UPSP:TAGL_HUMAN  | 4          | R.LGFQVWLK.N                    |
| 1    | 2      | 17/34 | 0.1523 | 2.9128 | UPSP:TAGL_HUMAN  | 4          | R.LVEWIIVQCGPDVGRPDR.G          |
| 1    | 2      | 17/22 | 0.3242 | 3.7983 | UPSP:TAGL_HUMAN  | 6          | R.TLM*ALGSLAVTK.N               |
| 1    | 2      | 14/40 | 0.2070 | 2.1028 | UPSP:TAGL2_HUMAN | 5          | K.DGTVLCELINALYPEGQAPVK.K       |
| 1    | 3      | 27/84 | 0.0695 | 3.0308 | UPSP:TAGL2_HUMAN | 5          | K.DGTVLCELINALYPEGQAPVKK.I      |
| 1    | 2      | 12/16 | 0.0544 | 2.6770 | UPSP:TAGL2_HUMAN | 6          | K.IQASTM*AFK.Q                  |
| 1    | 2      | 15/20 | 0.1053 | 2.1763 | UPSP:TAGL2_HUMAN | 6          | K.NVIGLQM*GTNR.G                |
| 1    | 2      | 21/26 | 0.3978 | 4.5299 | UPSP:TAGL2_HUMAN | 6          | K.QM*EQISQFLQAAER.Y             |
| 1    | 2      | 19/26 | 0.2311 | 3.8568 | UPSP:TAGL2_HUMAN | 6          | K.QMEQISQFLQAAER.Y              |
| 1    | 3      | 28/72 | 0.2739 | 4.7564 | UPSP:TAGL2_HUMAN | 6          | K.QYDADLEQILIQWITTQCR.K         |
| 1    | 2      | 17/26 | 0.3401 | 3.9271 | UPSP:TAGL2_HUMAN | 6          | R.DDGLFSGDPNWFVK.K              |
| 1    | 2      | 16/20 | 0.1198 | 3.0801 | UPSP:TAGL2_HUMAN | 6          | R.NFSDNQLQEGK.N                 |
| 1    | 2      | 19/22 | 0.3503 | 3.9924 | UPSP:TAGL2_HUMAN | 6          | R.TLM*NLGGLAVAR.D               |
| 1    | 2      | 25/34 | 0.3975 | 5.8066 | UPSP:TAGL2_HUMAN | 6          | R.YGINTTDIFQTVDLWEGK.N          |

**UPSP:TAGL\_HUMAN** (Q01995, homo sapiens): Transgelin (smooth muscle protein 22-alpha) [MASS=22480]  
 ANKGPSYGM S REVQSKIEK **YDEELEERLV EWIIVQCGPD VGRPDRGR LG FQVWLKNGVI LSKLVNSLYP DGSKPKVPE**  
**NPSPMVFKQM EQVAQFLKAA EDYGVIKTDM FQTVDLFEFGK DMAAVQRTLM ALGSLAVTKN DGHYRGDPNW FMKKAQEHKR**  
**EFTESQLQEG KHVIGLQMG S NRGASQAGMT GYGRPRQIIS**

| Position | MH+       | Sequence                   |
|----------|-----------|----------------------------|
| 99-107   | 966.0789  | AAEDYGVIK                  |
| 49-56    | 991.2211  | LGFQVWLK                   |
| 146-153  | 995.1407  | GDPNWFMK                   |
| 21-28    | 1083.0967 | YDEELEER                   |
| 128-139  | 1205.4986 | TLMALGSLAVTK               |
| 20-28    | 1211.2708 | KYDEELEER                  |
| 89-98    | 1222.4449 | QMEQVAQFLK                 |
| 78-88    | 1245.4793 | VPENPPSMVFK                |
| 161-171  | 1296.3764 | EFTESQLQEGK                |
| 64-77    | 1517.7655 | LVNSLYPDGSKPKV             |
| 108-120  | 1531.7206 | TDMFQTVDLFEFGK             |
| 29-46    | 2053.3868 | LVEWIIVQCGPDVGRPDR         |
| 108-127  | 2303.6102 | TDMFQTVDLFEFGKDMAAVQR      |
| 64-88    | 2744.2216 | LVNSLYPDGSKPKV.VPENPPSMVFK |

Protein coverage by amino acid count: 130/200 = **65.0%**  
 Protein coverage by mass: 14818/22480 = **65.9%**

**UPSP:TAGL2\_HUMAN** (P37802, homo sapiens): Transgelin-2 (sm22-alpha homolog) [MASS=22260]  
 ANRGPAYGLS REVQQKLEKQ **YDADLEQILI QWITTQCRKD VGRPQPGREN FQNLKDGTV LCELINALYP EGQAPVKKIQ**  
**ASTMAFKQME QISQFLQAAE RYGINTTDIF QTVDLWEGKN MACVQRTLMN LGGLAVARDD GLFSGDPNWF PKKSKEENPRN**  
**FSDNQLQEGK NVIGLQMG TN RGASQAGMTG YGMPRQIL**

| Position | MH+       | Sequence               |
|----------|-----------|------------------------|
| 79-87    | 997.1975  | IQASTMAFK              |
| 171-181  | 1203.4019 | NVIGLQMGITNR           |
| 127-138  | 1216.4844 | TLMNLGGLAVAR           |
| 160-170  | 1280.3365 | NFSDNQLQEGK            |
| 139-152  | 1595.7081 | DDGLFSGDPNWFVK         |
| 88-101   | 1679.8883 | QMEQISQFLQAAER         |
| 102-119  | 2101.3202 | YGINTTDFQTVDLWEGK      |
| 57-77    | 2231.5689 | DGTVLCELINALYPEGQAPVK  |
| 20-38    | 2338.6402 | QYDADLEQILIQWITTQCR    |
| 57-78    | 2359.7430 | DGTVLCELINALYPEGQAPVKK |

Protein coverage by amino acid count: 130/198 = **65.7%**

Protein coverage by mass: 14620/22260 = **65.7%**

## (2) Spot 3: PPIA

| Rank | Charge | Ions   | dCn    | XCorr  | Reference         | Redundancy | Peptide                              |
|------|--------|--------|--------|--------|-------------------|------------|--------------------------------------|
| 1    | 2      | 11/20  | 0.1456 | 2.1931 | UPTR:Q3KQW3_HUMAN | 6          | K.EGM*NIVEAM*ER.F                    |
| 1    | 2      | 14/16  | 0.0115 | 3.3212 | UPTR:Q3KQW3_HUMAN | 4          | K.FEDENFILK.H                        |
| 1    | 3      | 40/104 | 0.2938 | 6.3140 | UPTR:Q3KQW3_HUMAN | 5          | K.HTGPGILSM*ANAGPNTNGSQFFICTA<br>K.T |
| 1    | 1      | 12/18  | 0.2374 | 2.0223 | UPTR:Q3KQW3_HUMAN | 4          | K.ITIADCGQLE.-                       |
| 1    | 2      | 14/20  | 0.0544 | 2.5882 | UPTR:Q3KQW3_HUMAN | 4          | K.KITIADCGQLE.-                      |
| 1    | 2      | 21/28  | 0.2476 | 5.5171 | UPTR:Q3KQW3_HUMAN | 4          | K.SIYGEKFEDENFILK.H                  |
| 1    | 2      | 9/12   | 0.0210 | 1.6488 | UPTR:Q3KQW3_HUMAN | 7          | K.TEWLDGK.H                          |
| 1    | 2      | 11/24  | 0.1353 | 1.8577 | UPTR:Q3KQW3_HUMAN | 6          | K.VKEGM*NIVEAM*ER.F                  |
| 1    | 2      | 19/26  | 0.3914 | 1.6097 | UPTR:Q3KQW3_HUMAN | 5          | R.IIPGFM*COGGDFTR.H                  |
| 1    | 2      | 14/16  | 0.2000 | 3.3743 | UPTR:Q3KQW3_HUMAN | 4          | R.VSFELFADK.V                        |

|                                                                                                                                                                                                                                                                                                                                                                                             |
|---------------------------------------------------------------------------------------------------------------------------------------------------------------------------------------------------------------------------------------------------------------------------------------------------------------------------------------------------------------------------------------------|
| <b>UPTR:Q3KQW3_HUMAN</b> (Q3kqw3, homo sapiens): Peptidylprolyl isomerase a, isoform 1 [MASS=18012]<br>MVNPTVFFDI AVDGEPLGRV <b>SFELFADK</b> VPTAENFRALS TGEKGFYK SCFHR <b>IIPGF</b> <b>MCQGGDFTR</b> H NGTGGK <b>SIYG</b><br><b>EKFEDENFIL</b> <b>KHTGPGILSM</b> <b>ANAGPNTNGS</b> <b>QFFICTAKTE</b> <b>WLDGKHVVP</b> G <b>KVKEGMNIVE</b> <b>AMERFGSRNG</b> <b>KTSKKITIAD</b> <b>CGQLE</b> |
|---------------------------------------------------------------------------------------------------------------------------------------------------------------------------------------------------------------------------------------------------------------------------------------------------------------------------------------------------------------------------------------------|

| Position | MH+       | Sequence                    |
|----------|-----------|-----------------------------|
| 119-125  | 848.9310  | TEWLDGK                     |
| 20-28    | 1056.2036 | VSFELFADK                   |
| 156-165  | 1063.2108 | ITIADCGQLE                  |
| 83-91    | 1155.2927 | FEDENFILK                   |
| 155-165  | 1191.3849 | KITIADCGQLE                 |
| 134-144  | 1279.4689 | EGMNIVEAMER                 |
| 132-144  | 1506.7756 | VKEGMNIVEAMER               |
| 56-69    | 1542.8109 | IIPGFMCOGGDFTR              |
| 77-91    | 1833.0478 | SIYGEKFEDENFILK             |
| 92-118   | 2736.0924 | HTGPGILSMANAGPNTNGSQFFICTAK |

Protein coverage by amino acid count: 96/165 = **58.2%**

Protein coverage by mass: 10601/18012 = **58.9%**

## (3) Spot 5: TAGLN2

| Rank | Charge | Ions  | dCn    | XCorr  | Reference        | Redundancy | Peptide                    |
|------|--------|-------|--------|--------|------------------|------------|----------------------------|
| 1    | 2      | 18/40 | 0.3948 | 3.2269 | UPSP:TAGL2_HUMAN | 5          | K.DGTVLCELINALYPEGQAPVK.K  |
| 1    | 3      | 32/84 | 0.3908 | 3.9225 | UPSP:TAGL2_HUMAN | 5          | K.DGTVLCELINALYPEGQAPVKK.I |
| 1    | 2      | 11/16 | 0.0864 | 1.9669 | UPSP:TAGL2_HUMAN | 6          | K.IQASTM*AFK.Q             |
| 1    | 2      | 18/20 | 0.2653 | 3.7665 | UPSP:TAGL2_HUMAN | 6          | K.NVIGLQM*GTNR.G           |
| 1    | 2      | 21/26 | 0.3265 | 4.4890 | UPSP:TAGL2_HUMAN | 6          | K.QM*EQISQFLQAAER.Y        |
| 1    | 2      | 20/26 | 0.2154 | 3.8847 | UPSP:TAGL2_HUMAN | 6          | K.QMEQISQFLQAAER.Y         |
| 1    | 2      | 20/36 | 0.3535 | 4.6966 | UPSP:TAGL2_HUMAN | 6          | K.QYDADLEQILIQWITTQCR.K    |
| 1    | 2      | 18/26 | 0.3376 | 4.5029 | UPSP:TAGL2_HUMAN | 6          | R.DDGLFSGDPNWFVK.K         |

|                                                                                                                                                                                                                                                                      |   |       |        |        |                  |   |                        |
|----------------------------------------------------------------------------------------------------------------------------------------------------------------------------------------------------------------------------------------------------------------------|---|-------|--------|--------|------------------|---|------------------------|
| 1                                                                                                                                                                                                                                                                    | 2 | 14/28 | 0.3001 | 3.7264 | UPSP:TAGL2 HUMAN | 6 | R.DDGLFSGDPNWFPPK.S    |
| 1                                                                                                                                                                                                                                                                    | 2 | 14/20 | 0.2014 | 3.2672 | UPSP:TAGL2 HUMAN | 6 | R.NFSDNQLQEGK.N        |
| 1                                                                                                                                                                                                                                                                    | 2 | 20/22 | 0.3892 | 4.0798 | UPSP:TAGL2 HUMAN | 6 | R.TLM*NLGGLAVAR.D      |
| 1                                                                                                                                                                                                                                                                    | 2 | 20/22 | 0.2385 | 4.3082 | UPSP:TAGL2 HUMAN | 6 | R.TLMNLGGLAVAR.D       |
| 1                                                                                                                                                                                                                                                                    | 3 | 34/68 | 0.3539 | 5.7351 | UPSP:TAGL2 HUMAN | 6 | R.YGINTTDIFQTVDLWEGK.N |
| <b>UPSP:TAGL2_HUMAN</b> (P37802 homo sapiens): Transgelin-2 (sm22-alpha homolog) [MASS=22260]                                                                                                                                                                        |   |       |        |        |                  |   |                        |
| ANRGPAYGLS REVQOKIEKQ <u>YDADLEQILI QWITTQCRK</u> D VGRPQPGREN FQNWLKDGTV <u>LCELINALYP EGQAPVKKIQ</u><br><u>ASTMAFKQME QISQFLQAAE RYGINTTDIF QTVDLWEGK</u> N MACVQRTLMN <u>LGGLAVARDD GLFSGDPNWF PPKSKENPRN</u><br><u>FSDNQLQEGK NVIGLQMGTN RGASQAGMTG YGMPRQIL</u> |   |       |        |        |                  |   |                        |

| Position | MH+       | Sequence               |
|----------|-----------|------------------------|
| 79-87    | 997.1975  | IQASTMAFK              |
| 171-181  | 1203.4019 | NVIGLQMGTNR            |
| 127-138  | 1216.4844 | TLMNLGGLAVAR           |
| 160-170  | 1280.3365 | NFSDNQLQEGK            |
| 139-152  | 1595.7081 | DDGLFSGDPNWFPPK        |
| 88-101   | 1679.8883 | QMEQISQFLQAAER         |
| 139-153  | 1723.8822 | DDGLFSGDPNWFPPK        |
| 102-119  | 2101.3202 | YGINTTDIFQTVDLWEGK     |
| 57-77    | 2231.5689 | DGTVLCELINALYPEGQAPVK  |
| 20-38    | 2338.6402 | QYDADLEQILIQWITTQCR    |
| 57-78    | 2359.7430 | DGTVLCELINALYPEGQAPVKK |

Protein coverage by amino acid count: 131/198 = **66.2%**

Protein coverage by mass: 14748/22260 = **66.3%**
